# Supplementary material for: Gross motor coordination and their relationship with body mass and physical activity level during growth in Children aged 8–11 years old: a longitudinal and allometric approach
Source: PeerJ. 2022 Jun 8;10:e13483. doi: 10.7717/peerj.13483 (PMC9188308; doi:10.7717/peerj.13483)
Supplement: Supplemental Information 1 [file peerj-10-13483-s001.xlsx]

## Sheet: Group 1
					Anthropometry		Gross motor coordination (KTK 3)				Paq-c
Nome	sex	Age	Years of test	class	height (m)	mass (kg)	wb_raw	js_raw	ms_raw	raw score	PA
a1	M	8	2017	3	1.37	35.5	59	30	38	127	3.38
a1	M	9	2018	4	1.43	36.8	59	51	40	150
a1	M	10	2019	5	1.48	42	49	65	41	155
a1	M	11	2020	6	1.55	48.5	64	65	42	171	3.2
a10	M	8	2017	3	1.3	30.05	40	37	34	111	3.19
a10	M	9	2018	4	1.36	36.5	42	50	19	111
a10	M	10	2019	5	1.45	50.5	48	70	41	159
a10	M	11	2020	6	1.51	56.4	42	71	36	149	3.1
a11	M	8	2017	3	1.25	26.6	53	50	42	145	3.52
a11	M	9	2018	4	1.3	28	51	74	30	155
a11	M	10	2019	5	1.35	32	66	81	52	199
a11	M	11	2020	6	1.4	34.7	61	88	55	204	2.7
a12	F	8	2017	3	1.34	35.7	45	45	28	118	2.81
a12	F	9	2018	4	1.42	40.8	38	48	22	108
a12	F	10	2019	5	1.45	43.5	43	50	28	121
a12	F	11	2020	6	1.52	48.6	52	55	39	146	1.8
a13	M	8	2017	3	1.34	27.7	39	50	26	115	2.73
a13	M	9	2018	4	1.41	29.3	51	62	21	134
a13	M	10	2019	5	1.47	36.5	57	60	34	151
a13	M	11	2020	6	1.51	41.2	60	73	38	171	2
a14	M	8	2017	3	1.31	27.3	33	57	30	120	3.77
a14	M	9	2018	4	1.35	29.3	48	60	36	144
a14	M	10	2019	5	1.42	33.5	42	72	35	149
a14	M	11	2020	6	1.47	35.9	33	83	42	158	2.6
a15	M	8	2017	3	1.25	24.3	49	51	36	136	3.55
a15	M	9	2018	4	1.27	26.1	54	66	25	145	2.7
a15	M	10	2019	5	1.34	29.5	47	72	48	167
a15	M	11	2020	6	1.4	33.5	62	77	50	189	2.6
a16	M	8	2017	3	1.33	34.6	39	49	34	122	2.97
a16	M	9	2018	4	1.37	35.5	35	60	38	133
a16	M	10	2019	5	1.42	39	55	77	48	180
a16	M	11	2020	6	1.48	44	49	85	44	178
a17	M	8	2017	3	1.31	30.5	35	50	36	121	3.05
a17	M	9	2018	4	1.36	35	48	59	42	149
a17	M	10	2019	5	1.42	41.5	41	54	38	133
a17	M	11	2020	6	1.46	47.8	33	80	39	152	2.6
a2	F	9	2017	3	1.35	34	35	39	42	116	3.93
a2	F	10	2018	4	1.4	38.3	53	60	22	135
a2	F	11	2019	5	1.52	45	55	63	37	155
a2	F	11	2020	6	1.6	48	56	66	43	165	3.2
a3	M	8	2017	3	1.23	23.6	29	34	28	91	2.98
a3	M	9	2018	4	1.3	27	31	50	38	119	3.4
a3	M	10	2019	5	1.37	29	32	74	41	147
a3	M	11	2020	6	1.4	32.1	46	74	47	167	2.7
a4	F	8	2017	3	1.53	39	36	61	28	125	3.86
a4	F	9	2018	4	1.6	42.5	58	66	24	148
a4	F	10	2019	5	1.66	49.5	72	67	45	184
a4	F	11	2020	6	1.72	50.4	60	82	50	192	2.5
a5	F	8	2017	3	1.21	25	58	70	46	174	3.54
a5	F	9	2018	4	1.26	29.2	70	83	28	181
a5	F	10	2019	5	1.33	37	67	76	46	189
a5	F	11	2020	6	1.37	42.7	67	84	52	203	4.8
a6	M	8	2017	3	1.34	37.6	49	33	36	118	3.37
a6	M	9	2018	4	1.38	43.1	56	60	38	154
a6	M	10	2019	5	1.46	49	43	76	38	157
a6	M	11	2020	6	1.55	52	51	73	40	164	2.8
a7	F	8	2017	3	1.25	25.8	42	37	32	111	2.66
a7	F	9	2018	4	1.3	27.9	39	56	21	116
a7	F	10	2019	5	1.37	32.5	58	73	40	171
a7	F	11	2020	6	1.41	35.2	57	74	36	167	2.5
a8	M	9	2017	3	1.3	25.2	44	43	28	115	2.62
a8	M	10	2018	4	1.35	27.9	55	61	21	137
a8	M	11	2019	5	1.41	32	48	79	39	166
a8	M	11	2020	6	1.52	37.7	56	48	36	140	2.6
a9	M	8	2017	3	1.18	22.6	29	29	32	90	3.07
a9	M	9	2018	4	1.28	25.6	29	37	36	102	4.6
a9	M	10	2019	5	1.3	28	34	51	37	122
a9	M	11	2020	6	1.34	31.6	42	64	31	137	2.8

## Sheet: Group 2
					Anthropometry		Gross motor coordination (KTK 3)				Paq-c
Name	sex	age	year of test	class	height (m)	mass (kg)	wb_raw	js_raw	ms_raw	raw score	PA
b1	F	9	2017	4	1.16	21.3	40	33	34	107	2.79
b1	F	10	2018	5	1.21	21.2	52	62	34	148	2.6
b1	F	11	2019	6	1.27	22.4	50	67	36	153
b1	F	12	2020	7	1.33	24.5	61	70	33	164	2.9
b10	F	9	2017	4	1.33	32.5	39	52	38	129	2.49		17
b10	F	10	2018	5	1.38	36.4	42	58	38	138			43
b10	F	11	2019	6	1.47	40	56	71	49	176			44
b10	F	12	2020	7	1.54	45.3	60	69	42	171	2.8
b11	M	10	2017	4	1.55	39.2	41	44	42	127	2.95
b11	M	11	2018	5	1.65	44.5	56	69	56	181	2.4
b11	M	12	2019	6	1.74	52.4	45	60	35	140
b11	M	13	2020	7	1.79	55.5	52	74	49	175	3.3
b12	F	9	2017	4	1.35	50.06	24	25	22	71	1.84
b12	F	10	2018	5	1.41	55.8	45	50	28	123	3.2
b12	F	11	2019	6	1.47	60	28	45	35	108
b12	F	12	2020	7	1.55	71.6	41	54	36	131	2.1
b13	F	9	2017	4	1.41	32.8	40	48	34	122	3.45
b13	F	10	2018	5	1.38	36	60	60	34	154	3.2
b13	F	11	2019	6	1.45	44.7	38	51	34	123
b13	F	12	2020	7	1.54	48	52	65	42	159	2.8
b14	M	10	2017	4	1.43	26.6	44	64	38	146	3.51
b14	M	11	2018	5	1.47	34.2	54	70	46	170	3.5
b14	M	12	2019	6	1.5	38.2	66	88	55	209
b14	M	12	2020	7	1.5	44.1	54	86	50	190	2.7
b15	F	9	2017	4	1.34	39.08	50	62	48	160	3.7
b15	F	10	2018	5	1.38	40.2	61	73	46	180	3.2
b15	F	11	2019	6	1.47	51.3	55	56	30	141
b15	F	12	2020	7	1.54	56.8	58	96	52	206	2.4
b16	F	10	2017	4	1.32	37.09	37	47	36	120	2.36
b16	F	10	2018	5	1.36	39.6	63	59	38	160	2.4
b16	F	11	2019	6	1.41	35.6	67	66	42	175
b16	F	12	2020	7	1.5	41.7	66	66	44	176	2.1
b17	F	9	2017	4	1.38	33.07	54	60	34	148	3.49
b17	F	10	2018	5	1.5	40.3	41	66	44	151	3.6
b17	F	11	2019	6	1.57	46.5	61	80	50	191
b17	F	12	2020	7	1.5	50.1	54	84	52	190	2.8
b18	M	9	2017	4	1.24	24.08	39	69	38	146	2.89
b18	M	10	2018	5	1.29	27.6	57	73	44	174	4.1
b18	M	11	2019	6	1.32	30	63	76	43	182
b18	M	12	2020	7	1.4	30.9	59	81	46	186	3.5
b19	F	9	2017	4	1.31	31	45	54	36	135	2.38
b19	F	10	2018	5	1.33	36.6	54	56	40	150	1.7
b19	F	11	2019	6	1.38	45	46	57	38	141
b19	F	12	2020	7	1.48	48.2	47	56	46	149
b2	F	10	2017	4	1.3	27	61	57	40	158	2.16
b2	F	11	2018	5	1.35	30	81	69	42	192	2.1
b2	F	12	2019	6	1.4	35	72	64	41	177
b2	F	12	2020	7	1.49	40.8	68	66	43	177	1.8
b20	M	9	2017	4	1.4	41.2	47	62	42	151	3.69
b20	M	10	2018	5	1.45	43.6	52	69	42	163	4.1
b20	M	11	2019	6	1.49	46.4	61	77	42	180
b20	M	12	2020	7	1.57	50.3	46	78	42	166	3.5
b21	F	9	2017	4	1.3	28.08	50	49	34	133	2.84
b21	F	10	2018	5	1.37	32.3	51	55	44	150	3.5
b21	F	11	2019	6	1.47	40.2	55	61	41	157
b21	F	12	2020	7	1.53	46.3	68	67	50	185	2.6
b22	F	9	2017	4	1.4	37.04	55	46	38	139	2.31
b22	F	10	2018	5	1.47	43.3	50	61	40	151	2.3
b22	F	11	2019	6	1.58	50	61	69	47	177
b22	F	12	2020	7	1.55	52.9	70	70	52	192	2.2
b23	M	9	2017	4	1.28	28.4	29	51	34	114	2.47
b23	M	10	2018	5	1.32	31.2	53	60	40	153
b23	M	11	2019	6	1.41	37	57	57	45	159
b23	M	12	2020	7	1.54	45.1	40	72	44	156	2.1
b24	M	10	2017	4	1.42	29.05	46	70	54	170	3.65
b24	M	11	2018	5	1.46	32.5	72	88	64	224	4.1
b24	M	12	2019	6	1.55	36.5	68	75	54	197
b24	M	13	2020	7	1.64	41.4	67	109	55	231	3.8
b25	M	10	2017	4	1.43	31.3	43	64	44	151	2.71
b25	M	11	2018	5	1.56	40.02	59	62	34	155	3.3
b25	M	12	2019	6	1.63	44.2	60	70	44	174
b25	M	12	2020	7	1.72	49.4	62	80	44	186	4.3
b26	M	9	2017	4	1.39	46.2	47	51	42	140
b26	M	10	2018	5	1.4	49	56	62	46	164
b26	M	11	2019	6	1.47	52.3	55	77	35	167
b26	M	12	2020	7	1.5	58	36	82	52	170	2.1
b27	M	9	2017	4	1.43	46.09	29	48	34	111	3.9
b27	M	10	2018	5	1.49	55.3	23	64	40	127	3
b27	M	11	2019	6	1.56	60.9	26	72	39	137
b27	M	12	2020	7	1.6	64.9	27	77	54	158	3.4
b28	M	9	2017	4	1.34	30.9	43	52	32	127	1.85
b28	M	10	2018	5	1.38	35.5	45	60	38	143
b28	M	11	2019	6	1.41	41.2	48	70	41	159
b28	M	12	2020	7	1.57	53.1	43	76	43	162
b29	F	10	2017	4	1.38	35.03	38	45	30	113	2.04
b29	F	11	2018	5	1.41	28.2	57	67	44	168	2.5
b29	F	12	2019	6	1.57	43.5	71	78	47	196
b29	F	12	2020	7	1.53	46.7	60	84	51	195	2.3
b3	F	9	2017	4	1.54	50.8	57	74	40	171	3.85
b3	F	10	2018	5	1.6	58	50	82	52	184	3.5
b3	F	11	2019	6	1.68	70	56	86	51	193
b3	F	12	2020	7	1.75	69.9	65	83	58	206	2.5
b30	M	9	2017	4	1.4	38	30	52	32	114	3.36
b30	M	10	2018	5	1.46	40.01	47	49	38	134	2.7
b30	M	11	2019	6	1.52	44.2	36	46	38	120
b30	M	12	2020	7	1.57	49	26	57	35	118	2.6
b31	M	9	2017	4	1.34	43.5	35	56	46	137	2.65
b31	M	10	2018	5	1.45	47.9	38	56	38	132
b31	M	11	2019	6	1.42	49.6	48	70	44	162
b31	M	12	2020	7	1.46	56.4	36	80	41	157	2.6
b32	M	9	2017	4	1.35	42.3	50	60	36	146	4.7
b32	M	10	2018	5	1.45	46.8	48	69	42	159	4.3
b32	M	11	2019	6	1.52	58.5	55	75	44	174
b32	M	12	2020	7	1.57	62	41	74	44	159	3.5
b33	M	9	2017	4	1.37	36.03	42	56	36	134	2.6
b33	M	10	2018	5	1.42	39.5	49	68	44	161	3.2
b33	M	11	2019	6	1.5	42.2	52	72	38	162
b33	M	12	2020	7	1.56	46.8	55	89	51	195	3.4
b34	F	9	2017	4	1.34	25.5	45	59	44	148	3.02
b34	F	10	2018	5	1.41	36.5	64	66	42	172	3.4
b34	F	11	2019	6	1.47	32.2	67	73	54	194
b34	F	12	2020	7	1.56	36.3	58	79	61	198	2.7
b35	F	9	2017	4	1.32	29.4	33	53	36	122	3.24
b35	F	10	2018	5	1.37	35.7	49	53	44	146	3
b35	F	11	2019	6	1.47	41.5	63	73	47	183
b35	F	12	2020	7	1.5	43.5	59	75	50	184	2.9
b36	F	9	2017	4	1.33	31.8	44	54	34	132	3.14
b36	M	10	2018	5	1.39	47.9	62	76	40	178	4.1
b36	M	11	2019	6	1.49	41.2	59	82	44	185
b36	F	12	2020	7	1.55	46.7	51	63	51	165	3.2
b37	F	9	2017	4	1.23	25	41	58	46	145	2.89
b37	F	10	2018	5	1.32	29.4	55	62	48	165	3.5
b37	F	11	2019	6	1.42	38.2	53	69	51	173
b37	F	12	2020	7	1.49	45.5	60	66	47	173	2.9
b38	M	9	2017	4	1.35	40.05	42	53	40	135
b38	M	10	2018	5	1.42	43.6	51	56	40	147	3.6
b38	M	11	2019	6	1.45	46	50	74	44	168
b38	M	12	2020	7	1.67	62.3	45	68	47	160	2
b39	F	9	2017	4	1.37	50.2	35	40	30	105	2.69
b39	F	10	2018	5	1.41	53.8	49	65	30	144	2.6
b39	F	11	2019	6	1.55	67.7	44	53	37	134
b39	F	12	2020	7	1.55	70	50	63	45	158	2.7
b4	F	9	2017	4	1.36	31.08	55	47	40	142	2.76
b4	F	10	2018	5	1.42	33.6	50	67	48	165	3.2
b4	F	11	2019	6	1.52	40.09	52	54	31	137
b4	F	12	2020	7	1.54	46	58	64	52	174	2.3
b40	M	9	2017	4	1.36	37.02	43	51	44	138	3.95
b40	M	10	2018	5	1.43	41.9	35	61	56	152	3.3
b40	M	11	2019	6	1.55	57.3	48	66	33	147
b40	M	12	2020	7	1.63	66.6	45	77	50	172	2.4
b41	F	9	2017	4	1.38	38.3	61	65	40	166	4.04
b41	F	10	2018	5	1.45	41.3	63	63	44	170	3.8
b41	F	11	2019	6	1.51	47.5	62	79	48	189
b41	F	12	2020	7	1.59	49.8	64	82	52	198	2.7
b42	F	9	2017	4	1.44	50.5	28	69	34	131	2.49
b42	F	10	2018	5	1.56	49.5	47	57	46	150	2.4
b42	F	11	2019	6	1.65	60	52	71	44	167
b42	F	12	2020	7	1.7	55.5	49	78	48	175	2.7
b43	F	9	2017	4	1.48	62.07	31	57	40	128	3.18
b43	F	10	2018	5	1.53	70.8	50	53	48	151	4.1
b43	F	11	2019	6	1.58	74	33	71	49	153
b43	F	12	2020	7	1.55	80.1	30	65	42	137	2.9
b5	M	9	2017	4	1.25	25.7	50	70	56	176	1.1
b5	M	10	2018	5	1.29	28.5	69	86	56	211	3
b5	M	11	2019	6	1.35	32	61	87	40	188
b5	M	12	2020	7	1.41	37.6	63	95	61	219	2.7
b6	F	9	2017	4	1.45	43.03	41	55	32	128	3
b6	F	10	2018	5	1.55	52	34	53	36	123	2
b6	F	11	2019	6	1.62	55.08	37	78	41	156
b6	F	12	2020	7	1.61	52.1	41	73	44	158	3.2
b7	M	9	2017	4	1.35	38	27	37	36	100	3.22
b7	M	10	2018	5	1.36	42	43	45	38	126	1.8
b7	M	11	2019	6	1.46	50	38	50	45	133
b7	M	12	2020	7	1.54	57.1	23	59	42	124
b8	F	10	2017	4	1.51	54.9	31	59	28	118	3.37
b8	F	11	2018	5	1.49	55	44	60	36	140	2.8
b8	F	12	2019	6	1.5	58.4	57	59	45	161
b8	F	12	2020	7	1.49	59.6	72	62	42	176	2.5
b9	F	10	2017	4	1.36	31.06	46	58	32	136	2.85
b9	F	11	2018	5	1.49	38	61	66	38	165	3.4
b9	F	12	2019	6	1.6	47.7	60	72	43	175
b9	F	12	2020	7	1.67	51.7	61	74	47	182	2.4

## Sheet: Group 3
					Anthropometry		Gross motor coordination (KTK 3)				Paq-c
Nome	sex	age	year of test	class	height (m)	mass (kg)	wb_raw	js_raw	ms_raw	raw score	PA
c1	M	10	2017	5	1.46	32.8	52	76	42	170	3.34
c2	M	11	2017	5	1.28	24.4	52	50	44	146	3
c3	M	10	2017	5	1.4	30.08	50	70	65	185	2.92
c4	M	10	2017	5	1.3	29.4	39	71	42	152	2.6
c5	M	10	2017	5	1.45	33.1	69	87	46	202
c6	F	10	2017	5	1.62	66.9	49	60	40	149	2.71
c7	M	10	2017	5	1.46	33.6	72	55	44	171
c8	M	10	2017	5	1.35	30.8	46	71	38	155
c9	F	10	2017	5	1.39	33.1	42	42	20	104	2.81
c10	F	10	2017	5	1.42	52.04	42	35	38	115	2.29
c11	F	10	2017	5	1.47	26.2	36	60	34	130	2.5
c12	F	10	2017	5	1.46	58.4	39	53	38	130	2.44
c13	F	10	2017	5	1.47	53.6	36	69	40	145	2.13
c14	M	10	2017	5	1.58	40.3	56	58	32	146	3.26
c15	F	11	2017	5	1.32	29.7	54	52	46	152	2.19
c16	F	8	2017	5	1.5	56.09	40	50	34	124	3.8
c17	F	10	2017	5	1.55	42.02	50	53	44	147	2.24
c18	M	11	2017	5	1.42	31.8	54	66	38	158	4.33
c19	M	10	2017	5	1.45	43.6	35	61	44	140	1.76
c20	F	10	2017	5	1.4	41.1	30	74	50	154	3.3
c21	F	10	2017	5	1.42	30.03	60	59	42	161	3.33
c22	F	10	2017	5	1.35	34.06	64	67	42	173	2.6
c23	M	10	2017	5	1.34	32.3	48	56	38	142	3.56
c24	F	10	2017	5	1.42	40.02	33	58	38	129	3.47
c25	M	10	2017	5	1.55	60.4	66	69	42	177	3.26
c26	M	10	2017	5	1.5	37.6	36	75	48	159	2.2
c27	F	10	2017	5	1.41	31.07	51	58	42	151	2.3
c28	M	11	2017	5	1.55	40, 07	47	52	42	141	2.38
c29	M	10	2017	5	1.4	27	37	37	34	108	2.44
c30	M	10	2017	5	1.53	35.8	52	50	32	134	3.35
c31	F	10	2017	5	1.47	52.2	33	37	28	98	3.18
c32	F	10	2017	5	1.34	29.9	58	44	42	144	2.72
c33	M	10	2017	5	1.44	31.06	41	52	38	131
c34	F	10	2017	5	1.45	41.5	44	60	46	150	2.97
c35	F	10	2017	5	1.34	33.2	44	63	30	137	3.42
c36	M	10	2017	5	1.56	65.1	23	31	32	86	1.89
c37	F	9	2017	5	1.42	41.09	57	55	40	152	2.57
c38	M	10	2017	5	1.48	37.3	52	64	38	154	2.8
c39	F	10	2017	5	1.38	56.7	26	57	32	115	3.34
c40	M	10	2017	5	1.3	27	70	55	44	169	2.79
c41	M	10	2017	5	1.5	61.02	23	26	34	83	2.42
c42	M	10	2017	5	1.48	37.2	32	70	36	138	3.14
c43	F	10	2017	5	1.44	57.4	58	52	28	138	3.65
c44	M	10	2017	5	1.25	25.03	28	54	38	120	1.95
c1	M	11	2018	7	1.58	41.7	49	83	56	188	2.2
c2	M	12	2018	6	1.36	27.6	59	62	44	165	4.1
c3	M	11	2018	6	1.47	35.4	60	74	48	182	2.8
c4	M	11	2018	6	1.36	33.4	67	62	38	167	3
c5	M	11	2018	6	1.51	46.2	58	66	48	172	3.2
c6	F	11	2018	6	1.66	68	64	73	46	183	2.2
c7	M	11	2018	6	1.58	39.4	69	78	46	193	3.5
c8	M	11	2018	6	1.49	44.5	37	58	40	135	2.3
c9	F	11	2018	6	1.49	35.6	40	63	38	141	2.7
c10	M	12	2018	6	1.69	65.9	54	77	38	169	1.7
c11	F	11	2018	6	1.4	26.4	58	65	30	153	1.7
c12	F	11	2018	6	1.47	34.1	28	65	42	135	2.5
c13	F	11	2018	6	1.39	50.3	49	73	32	154	3.3
c14	F	11	2018	6	1.47	57.8	39	60	30	129	1.9
c15	M	11	2018	6	1.47	39.6	63	63	42	168	2.6
c16	F	12	2018	6	1.37	34	60	62	34	156	2.1
c17	F	11	2018	6	1.47	34.6	49	62	36	147	1.8
c18	F	11	2018	6	1.47	32.5	56	60	30	146	2.3
c19	M	12	2018	6	1.4	35	54	76	30	160	3.9
c20	M	11	2018	6	1.51	50	51	66	36	153	2.5
c21	F	11	2018	6	1.4	37.3	31	86	48	165
c22	F	11	2018	6	1.5	33.6	60	70	44	174	3
c23	M	11	2018	6	1.37	34.3	56	76	48	180	2.4
c24	F	11	2018	6	1.52	60.6	55	47	44	146	2.7
c25	M	11	2018	6	1.49	47.2	35	53	50	138	3.2
c26	M	11	2018	6	1.57	67.6	61	83	48	192	3.2
c27	M	11	2018	6	1.53	43	58	78	42	178	2.7
c28	F	11	2018	6	1.45	42	45	59	32	136	1.9
c29	M	12	2018	6	1.61	47.6	48	60	34	142	3.3
c30	M	11	2018	6	1.44	30.1	58	58	44	160	2.5
c31	M	11	2018	6	1.56	37.2	61	58	44	163	3.4
c32	F	11	2018	6	1.46	51.7	51	80	36	167	3.7
c33	F	11	2018	6	1.42	36	66	69	42	177	2
c34	M	11	2018	6	1.49	34.8	44	62	40	146	1.8
c35	F	11	2018	6	1.62	46.5	63	84	32	179	2.8
c36	F	11	2018	6	1.54	38.1	45	76	32	153	3
c37	F	11	2018	6	1.62	73	34	58	36	128	2
c38	F	10	2018	6	1.49	46.8	45	58	42	145	2
c39	M	11	2018	6	1.55	41.3	38	58	46	142	1.8
c40	F	11	2018	6	1.44	59	51	62	36	149	3.2
c41	M	11	2018	6	1.36	30.8	54	70	44	168	3.7
c42	M	11	2018	6	1.6	62	33	58	36	127	2.4
c43	M	11	2018	6	1.55	45.8	46	70	44	160	2.9
c44	F	11	2018	6	1.49	64.3	63	78	32	173	3.4
c1	M	12	2019	7	1.62	45	48	44	66	158
c2	M	13	2019	7	1.4	28.3	63	85	52	200
c3	M	12	2019	7	1.53	38	67	82	53	202
c4	M	12	2019	7	1.42	38.5	62	75	52	189
c5	M	12	2019	7	1.7	72.5	55	77	46	178
c6	F	12	2019	7	1.54	40.6	58	66	41	165
c7	M	12	2019	7	1.55	41.3	66	74	38	178
c8	M	12	2019	7	1.43	38.8	53	61	39	153
c9	F	12	2019	7	1.5	40.7	48	66	29	143
c10	M	13	2019	7	1.79	72	62	80	47	189
c11	F	12	2019	7	1.5	29.5	65	69	42	176
c12	F	12	2019	7	1.58	66.5	35	66	43	144
c13	F	12	2019	7	1.66	64.3	58	85	41	184
c14	F	12	2019	7	1.58	61	54	63	39	156
c15	M	12	2019	7	1.67	51.3	58	75	41	174
c16	F	13	2019	7	1.46	38.7	59	66	46	171
c17	F	12	2019	7	1.63	69.5	45	32	33	110
c18	F	12	2019	7	1.67	50.1	52	81	49	182
c19	M	13	2019	7	1.53	44.5	57	80	59	196
c20	M	12	2019	7	1.56	53	38	80	47	165
c21	F	12	2019	7	1.61	54.9	42	73	45	160
c22	F	12	2019	7	1.57	36.7	61	85	43	189
c23	M	12	2019	7	1.53	48.4	62	87	41	190
c24	F	12	2019	7	1.48	42.4	44	70	48	162
c25	M	12	2019	7	1.61	54.01	40	60	45	145
c26	M	12	2019	7	1.63	76	68	38	55	161
c27	M	12	2019	7	1.6	44.9	59	85	56	200
c28	F	12	2019	7	1.51	42.9	49	59	38	146
c29	M	13	2019	7	1.71	49.9	62	76	47	185
c30	F	12	2019	7	1.48	30.8	58	62	42	162
c31	M	12	2019	7	1.71	47.6	53	76	31	160
c32	F	12	2019	7	1.5	61.5	62	61	48	171
c33	F	12	2019	7	1.48	38.7	72	71	53	196
c34	M	12	2019	7	1.53	37.1	53	69	46	168
c35	F	12	2019	7	1.66	49.7	45	70	53	168
c36	F	12	2019	7	1.63	44.3	49	77	48	174
c37	F	12	2019	7	1.66	76.2	30	73	35	138
c38	F	11	2019	7	1.54	50.8	54	80	27	161
c39	M	12	2019	7	1.68	51.5	37	70	32	139
c40	F	12	2019	7	1.51	56	48	64	43	155
c41	M	12	2019	7	1.4	30.3	64	69	46	179
c42	M	12	2019	7	1.64	65.8	56	45	35	136
c43	M	12	2019	7	1.6	45.2	60	85	44	189
c44	F	12	2019	7	1.57	72.7	61	62	43	166
c1	M	13	2020	8	1.7	49.9	49	99	60	208	2.9
c2		13	2020	8	1.43	30.9	53	82	46	181	2.3
c3	M	13	2020	8	1.68	45.8	68	85	49	202
c4	M	13	2020	8	1.57	45.1	50	75	45	170	2.4
c5	F	13	2020	8	1.73	72.4	67	85	45	197	2.8
c6	M	13	2020	8	1.59	46.2	60	89	47	196	2.7
c7	M	13	2020	8	1.59	44.9	66	107	51	224	3.2
c8	M	13	2020	8	1.52	40	36	82	53	171	1.9
c9	F	13	2020	8	1.57	45	37	73	37	147	1.9
c10	F	13	2020	8	1.6	57.4	44	64	38	146	2.3
c11	F	13	2020	8	1.58	33.8	50	67	39	156	1.6
c12	F	13	2020	8	1.56	73	62	75	46	183	2.3
c13	M	13	2020	8	1.7	69.8	48	107	50	205	2.8
c14	F	13	2020	8	1.6	59.6	45	64	45	154	1.9
c15	M	13	2020	8	1.74	58	55	87	52	194	1.9
c16	F	13	2020	8	1.55	45.3	44	61	48	153	2.3
c17	F	13	2020	8	1.64	73	39	71	45	155	1.6
c18	F	13	2020	8	1.72	56.5	58	70	47	175	3.2
c19	M	13	2020	8	1.6	49.8	63	83	48	194	3.8
c20	M	13	2020	8	1.7	57.3	38	99	51	188	3.2
c21	F	13	2020	8	1.61	60.2	39	48	57	144	2.8
c22	F	13	2020	8	1.66	45.5	53	75	49	177
c23	F	13	2020	8	1.57	49.4	68	105	47	220	2.3
c24	M	13	2020	8	1.64	46.5	36	89	49	174	3.1
c25	F	13	2020	8	1.63	63.2	31	76	53	160	2.6
c26	M	13	2020	8	1.67	74.9	66	97	51	214	3.3
c27	M	13	2020	8	1.7	50.4	61	95	53	209	2.6
c28	F	13	2020	8	1.53	45.7	31	62	32	125	1.8
c29	M	11	2020	8	1.85	59.6	47	84	43	174	3.1
c30	M	13	2020	8	1.56	34.4	52	66	47	165	2.1
c31	M	13	2020	8	1.77	52.3	42	89	54	185	2.6
c32	F	13	2020	8	1.56	64.2	50	67	47	164	1.8
c33	F	13	2020	8	1.52	46.3	61	76	54	191	2.7
c34	M	13	2020	8	1.7	45.5	45	73	48	166	1.8
c35	F	13	2020	8	1.69	50.5	46	79	51	176	1.5
c36	F	13	2020	8	1.68	49.6	41	74	44	159	2.1
c37	M	13	2020	8	1.73	93.8	33	72	42	147	2.5
c38	F	13	2020	8	1.62	62.1	62	77	42	181	1.7
c39	M	13	2020	8	1.71	55.9	37	90	51	178	1.4
c40	F	13	2020	8	1.55	54	52	75	50	177	3.6
c41	M	13	2020	8	1.48	37.3	55	81	50	186	2.6
c42	M	13	2020	8	1.75	76.2	16	45	33	94	2.3
c43	M	13	2020	8	1.76	56.7	61	86	53	200	3.6
c44	F	13	2020	8	1.62	66.9	56	62	35	153	2.6

## Sheet: Index
Class	attending class			m= middle school
				without letter= primary school
Gross Motor cootdination	KTK 3			Novak, A. et al, (2016) The Applicability of a Short Form of the KörperKoordinationsTest für Kinder for Measuring Motor Competence in Children Aged 6-11 Years
				Journal of Motor Learning and Development				10.1123/jmld.2016-0028
Phisycal Activity (PA)	PAQ-C			Benítez-Porres, J. et al. (2016). Reliability and Validity of the PAQ-C Questionnaire to Assess Physical Activity in Children
				The Journal of school health, 86(9), 677–685. https://doi.org/10.1111/josh.12418
